# Supplementary material for: Avidity of IgG to SARS-CoV-2 RBD as a Prognostic Factor for the Severity of COVID-19 Reinfection
Source: Viruses. 2022 Mar 16;14(3):617. doi: 10.3390/v14030617 (PMC8949074; doi:10.3390/v14030617)
Supplement: Supplementary file 1 [file viruses-14-00617-s001.zip › Supplementary file B_07-03-22.xlsx]

## Sheet: Data
Table B - S1. Meta-data and raw results for the samples in the studied groups.
Sample	Sex	Age, years	Date of sample collection	Days between the diagnosis and sample collection	IgG to RBD, PC	Mean OD in the intact (non-urea) well (in final dilution)	Mean OD in the denaturation (urea) well (in final dilution)	Avidity index, mean	Cohort	Lethal outcome?	PCR, Ct	Genetic markers (NGS)	IgG to NC-antigen, PC	Vaccinated?	For vaccinated		Days left between the first infection with SARS-CoV-2 and current sample collection (column D)	For re-infected patients: information regarding the first (previuos) case of COVID-19								The current case of COVID-19 (data obtained from clinics)							Comorbidities
															Vaccine	Date of the injection		Date of the first diagnosis	Date of the recovery	Severity (NEWS)	Date of the first PCR	PCR result	Date of antibody detection	IgM, PC	IgG, PC	Date of the COVID-19 diagnosis	Severity (NEWS)	Date of the first PCR	PCR result	Date of antibody detection	IgM, PC	IgG, PC	Obesity	Diabetes (I/II)	Immunodeficiency	Auto-immune
2122	m	61	2021-06-28	0	5.06	1.719	0.571	0.33217	Outpatient, primarily infected	No	20.58	L452R, T478K	0.19	one dose (partial course)	Sputnik V, component 1 (Ad26)	2021-06-12										2021-06-28	Low	?	?
2147	m	53	2021-06-28	0	5.3	1.809	1.632	0.902156	Outpatient, primarily infected	No	21.29	L452R, T478K	0.06	No	-	-										2021-06-28	Low	2021-06-27	positive	2020-12-02	0.3	0.16
2171	m	68	2021-06-29	0	7.38	2.834	0.318	0.112209	Outpatient, primarily infected	No	negative	negative PCR or low Ct	13.42	No	-	-										2021-06-29	Low	?	?					Yes
2188	m	47	2021-06-29	0	1.69	0.625	0.109	0.1744	Outpatient, primarily infected	No	28.55	L452R,T478K	0.09	one dose (partial course)	Sputnik V, component 1 (Ad26)	2021-06-12										2021-06-29	Low	?	?
2211	m	23	2021-06-29	0	11.07	3.555	0.811	0.228129	Outpatient, primarily infected	No	32.34	L452R,T478K	0.06	one dose (partial course)	Sputnik V, component 1 (Ad26)	2021-06-07										2021-06-29	No sympthoms	?	?
2216	m	73	2021-06-29	0	2.9	0.94	0.14	0.148936	Outpatient, primarily infected	No	negative	negative PCR or low Ct	6.92	No	-	-										2021-06-29	Low	2021-06-29	positive
2225	f	28	2021-06-29	0	5.14	1.411	0.524	0.371368	Outpatient, primarily infected	No	32.18	L452R,T478K	3.26	No	-	-										2021-06-29	Low	2021-06-30	positive
2226	f	49	2021-06-29	2	11.7	1.6	0.542	0.33875	Outpatient, primarily infected	No	negative	negative PCR or low Ct	11.87	No	-	-										2021-06-27	Low	?	?
2230	m	54	2021-06-29	0	5.09	1.3	0.581	0.446923	Outpatient, primarily infected	No	34.93	L452R, T478K	0.15	No	-	-										2021-06-29	Low	2021-06-28	positive	2021-06-28	0.85	0.46
2257	m	52	2021-06-29	0	3.11	1.105	0.799	0.723077	Outpatient, primarily infected	No	26.38	L452R, T478K	0.15	No	-	-										2021-06-29	Low	2021-06-28	positive
2331	f	72	2021-06-30	0	1.43	0.713	0.443	0.621318	Outpatient, primarily infected	No	35.12	negative PCR or low Ct	0.11	No	-	-										2021-06-30	Low	?	?
2365	f	25	2021-06-30	1	11.7	1.722	1.326	0.770035	Outpatient, primarily infected	No	negative	negative PCR or low Ct	13.85	No	-	-										2021-06-29	Low	?	?
2367	f	42	2021-06-30	1	3.42	0.483	0.123	0.254658	Outpatient, primarily infected	No	negative	negative PCR or low Ct	6.72	No	-	-										2021-06-29	Low	?	?
2395	m	30	2021-06-30	0	8.51	2.214	0.789	0.356369	Outpatient, primarily infected	No	отр	negative PCR or low Ct	4.46	No	-	-										2021-06-30	Low	2021-06-29	positive
2397	f	38	2021-06-30	0	8.1	1.929	1.685	0.87351	Outpatient, primarily infected	No	26.6	L452R,T478K	8.53	No	-	-										2021-06-30	Low	2021-06-30	positive
2403	m	41	2021-06-30	0	6.1	2.043	0.325	0.15908	Outpatient, primarily infected	No	32.25	L452R,T478K	12.4	No	-	-										2021-06-30	Low	?	?
2420	m	74	2021-06-30	0	11.7	1.017	0.195	0.19174	Outpatient, primarily infected	No	negative	negative PCR or low Ct	11.21	No	-	-										2021-06-30	Low	2021-06-29	positive
2422	f	26	2021-06-30	3	11.7	1.543	1.653	1.07129	Outpatient, primarily infected	No	negative	negative PCR or low Ct	12.24	No	-	-										2021-06-27	Medium	?	?
2430	f	53	2021-06-30	0	8.47	2.192	0.377	0.171989	Outpatient, primarily infected	No	22.64	L452R,T478K	1.24	one dose (partial course)	Sputnik V, component 1 (Ad26)	2021-06-15										2021-06-30	Low	?	?
2432	f	58	2021-06-30	1	2.24	0.658	0.188	0.285714	Outpatient, primarily infected	No	36.03	negative PCR or low Ct	1.96	No	-	-										2021-06-29	Low	?	?
2440	f	44	2021-06-30	3	4.56	0.961	0.479	0.498439	Outpatient, primarily infected	No	39.77	negative PCR or low Ct	1.01	No	-	-										2021-06-27	Low	2021-06-27	?
2459	m	36	2021-06-30	2	11.7	1.401	1.197	0.85439	Outpatient, primarily infected	No	35.97	negative PCR or low Ct	11.29	No	-	-										2021-06-28	Low	?	?
2473	m	33	2021-06-30	0	11.7	3.362	1.3	0.386675	Outpatient, primarily infected	No	29.76	negative PCR or low Ct	13.59	one dose (partial course)	Sputnik V, component 1 (Ad26)	2021-06-05										2021-06-30	Medium	2021-06-30	positive
2569	f	18	2021-07-05	0	9.58	2.153	0.882	0.409661	Outpatient, primarily infected	No	20.29	L452R,T478K	0.1	No	-	-										2021-07-05	No sympthoms	2021-07-05	positive
2570	f	27	2021-07-05	0	11.8	1.845	1.647	0.892683	Outpatient, primarily infected	No	28.24	L452R,T478K	9.97	No	-	-										2021-07-05	Low	2021-07-05	positive
2573	f	47	2021-07-05	0	11.8	2.197	0.044	0.0200273	Outpatient, primarily infected	No	negative	negative PCR or low Ct	1.45	No	-	-										2021-07-05	Low	?	?
2582	f	27	2021-07-05	0	12.83	0.52	0.462	0.888462	Outpatient, primarily infected	No	negative	negative PCR or low Ct	1.01	No	-	-										2021-07-05	Low	2021-07-05	positive
2589	f	45	2021-07-05	0	13.39	1.003	0.868	0.865404	Outpatient, primarily infected	No	26.74	L452R,T478K	0.15	No	-	-										2021-07-05	Low	2021-07-05	positive
2591	f	41	2021-07-05	0	9.8	1.791	1.784	0.996092	Outpatient, primarily infected	No	25.48	L452R,T478K	3.49	No	-	-										2021-07-05	Low	2021-07-05	positive
2592	m	46	2021-07-05	0	11.9	1.435	1.228	0.855749	Outpatient, primarily infected	No	35.05	negative PCR or low Ct	0.68	No	-	-										2021-07-05	Low	2021-07-05	positive
2593	f	32	2021-07-05	0	1.53	0.427	0.207	0.484778	Outpatient, primarily infected	No	36.21	negative PCR or low Ct	1.53	No	-	-										2021-07-05	Low	2021-07-05	positive
2595	f	53	2021-07-05	0	3.19	1.248	0.146	0.116987	Outpatient, primarily infected	No	19.44	L452R,T478K	0.39	No	-	-										2021-07-05	Low	2021-07-05	positive
2627	m	49	2021-07-06	0	7.72	2.164	0.47	0.21719	Outpatient, primarily infected	No	35.725	negative PCR or low Ct	11.82	No	-	-										2021-07-06	Low	2021-07-06	positive
2645	m	45	2021-07-06	0	12.02	1.53	0.12	0.0784314	Outpatient, primarily infected	No	32.01	negative PCR or low Ct	11.49	No	-	-										2021-07-06	Low	2021-07-06	positive
2704	m	45	2021-07-06	0	1.8	0.445	0.092	0.206742	Outpatient, primarily infected	No	22.867	L452R,T478K	0.35	No	-	-										2021-07-06	Low	2021-07-06	positive
2841	m	47	2021-07-07	0	11.47	1.909	0.752	0.393924	Outpatient, primarily infected	No	31.1	L452R,T478K	9.95	No	-	-										2021-07-07	Low	2021-07-07	positive
2852	m	74	2021-07-07	0	11.95	0.889	0.151	0.169854	Outpatient, primarily infected	No	negative	negative PCR or low Ct	6.71	No	-	-										2021-07-07	Low	2021-07-07	positive					Yes
2859	f	90	2021-07-07	0	10.21	1.877	0.127	0.0676612	Outpatient, primarily infected	No	32.54	negative PCR or low Ct	11.15	No	-	-										2021-07-07	Low	2021-07-07	positive
2871	m	49	2021-07-07	0	11.72	0.605	0.538	0.889256	Outpatient, primarily infected	No	32.96	negative PCR or low Ct	2.27	No	-	-										2021-07-07	Low	2021-07-07	positive
78	f	26	2021-06-09	1	11.9874	2.004	1.765	0.880739	Outpatient, re-infected	No	negative	negative PCR or low Ct	23.1239	No	-	-	375	2020-05-30	2020-06-22	Low	2020-05-30	positive	2020-05-31	0.33	0.3	2021-06-08	Low	2021-06-08	positive	2020-05-31	0.33	0.3
207	f	61	2021-06-09	1	11.412	3.221	3.126	0.970506	Outpatient, re-infected	No	negative	negative PCR or low Ct	24.0757	No	-	-	229	2020-10-23	2020-11-17	Low	2020-11-05	negative	2020-11-16	1.16	82.39	2021-06-08	Low	2021-06-08	positive	2020-11-16	1.16	82.39
209	m	38	2021-06-09	1	7.886	2.26	1.194	0.528319	Outpatient, re-infected	No	27,1	K417N, L452R, T478K	13.695	No	-	-	134	2021-01-26	2021-02-24	Low	2021-01-26	positive	2021-02-03	0.49	0.69	2021-06-08	Low	2021-06-08	positive	2021-02-03	0.49	0.69
306	f	47	2021-06-09	1	4.29286	3.904	0.964	0.246926	Outpatient, re-infected	No	negative	negative PCR or low Ct	7.17703	No	-	-	238	2020-10-14	2020-10-26	Low	2020-10-16	negative	2020-10-14	0.58	5.22	2021-06-08	Low	2021-06-08	positive	2020-10-14	0.58	5.22
309	f	58	2021-06-09	1	10.3086	2.423	0.896	0.36979	Outpatient, re-infected	No	negative	negative PCR or low Ct	13.6743	No	-	-	172	2020-12-19	2021-01-16	Low	2020-12-19	positive	2020-12-21	1.65	132	2021-06-08	Low	2021-06-08	positive	2020-12-21	1.65	132
496	f	49	2021-06-10	1	4.66057	1.198	0.911	0.760434	Outpatient, re-infected	No	26,6	L452R, T478K	10.8166	No	-	-	173	2020-12-19	2021-01-01	Low	2020-12-19	positive	2021-01-14	0.34	21.57	2021-06-09	Low	2021-06-09	positive	2021-01-14	0.34	21.57
773	f	32	2021-06-10	1	10.0446	3.261	3.317	1.01717	Outpatient, re-infected	No	23,616	L452R, T478K	20.6391	No	-	-	257	2020-09-26	2020-10-12	Low	2020-10-13	negative	N/D	-	-	2021-06-09	Low	2021-06-09	positive	2020-09-24	0.1	2.47
775	m	36	2021-06-10	1	10.4049	1.185	1.22	1.02954	Outpatient, re-infected	No	26,363	L452R, T478K	20.6898	No	-	-	197	2020-11-25		Low	2020-11-25	positive	N/D	-	-	2021-06-09	Low	2021-06-09	positive
777	m	33	2021-06-10	1	9.96829	3.094	3.307	1.06884	Outpatient, re-infected	No	29	L452R, T478K	20.4566	No	-	-	234	2020-10-19	2020-11-03	Low	2020-10-30	negative	N/D	-	-	2021-06-09	Low	2021-06-09	positive	2020-10-03	0.17	0.33
1195	m	48	2021-06-11	1	5.82429	2.481	1.789	0.72108	Outpatient, re-infected	No	25,14	L452R, T478K	11.0987	No	-	-	227	2020-10-27	2020-11-10	Middle	2020-11-06	negative	2021-04-12	0.8	32.89	2021-06-10	Low	2021-06-10	positive	2021-04-12	0.8	32.89
1196	m	44	2021-06-11	1	3.61571	1.577	1.265	0.802156	Outpatient, re-infected	No	37,48	negative PCR or low Ct	13.219	No	-	-	388	2020-05-19	2020-06-04	Middle	2020-05-20	negative	N/D	-	-	2021-06-10	No sympthoms	2021-06-10	positive
1235	f	21	2021-06-11	1	7.97086	1.933	1.761	0.911019	Outpatient, re-infected	No	negative	negative PCR or low Ct	21.5416	No	-	-	185	2020-12-08	2020-12-05	Low	2020-12-08	positive	2020-12-08	3.89	89.63	2021-06-10	No sympthoms	2021-06-09	positive	2020-12-08	3.89	89.63
1523	m	50	2021-06-12	1	13.9854	2.859	2.851	0.997202	Outpatient, re-infected	No	26,89	negative PCR or low Ct	19.5695	No	-	-	203	2020-11-21	2020-11-25	Low	2020-11-23	negative	N/D	-	-	2021-06-11	Low	2021-06-11	positive
1524	f	57	2021-06-12	1	4.32286	1.564	0.743	0.475064	Outpatient, re-infected	No	26,25	negative PCR or low Ct	7.0854	No	-	-	85	2021-03-19	2021-04-11	Low	2021-04-07	negative	2021-03-22	1.86	2.44	2021-06-11	N/A	2021-06-11	positive	2021-03-22	1.86	2.44
1533	f	29	2021-06-12	1	2.34943	1.246	0.571	0.458266	Outpatient, re-infected	No	23,37	E484K S494P	9.14956	No	-	-	178	2020-12-16	2020-12-29	Low	2020-12-26	negative	2021-02-16	0.64	10.27	2021-06-11	Low	2021-06-11	positive	2021-02-16	0.64	10.27
2173	f	69	2021-06-29	0	11.05	1.231	0.536	0.435418	Outpatient, re-infected	No	negative	negative PCR or low Ct	11.13	No	-	-	160	2021-01-20	2021-02-04	Low	2021-01-20	positive	N/D	-	-	2021-06-29	No sympthoms	2021-06-29	?
2191	f	34	2021-06-29	0	6.08	2.383	2.012	0.844314	Outpatient, re-infected	No	24.21	L452R,T478K,P479S	3.37	No	-	-	263	2020-10-09	2020-10-29	Low	2020-10-09	positive	N/D	-	-	2021-06-29	Low	?	?	2020-10-31	0.68	241.24
2202	f	70	2021-06-29	0	11.7	2.973	2.79	0.938446	Outpatient, re-infected	No	27.74	L452R,T478K	12.97	No	-	-	228	2020-11-13	2020-11-24	Middle	2020-11-13	positive	N/D	-	-	2021-06-29	Low	2021-06-28	positive	2020-11-18	5.28	168.41
2256	f	50	2021-06-29	0	6.16	1.439	0.765	0.531619	Outpatient, re-infected	No	negative	negative PCR or low Ct	3.94	No	-	-	228	2020-11-13	2020-11-29	Middle	2020-11-13	positive	N/D	-	-	2021-06-29	Medium	2021-06-29	positive	2020-11-14	0.64	0
2265	f	76	2021-06-29	0	10.77	2.049	1.766	0.861884	Outpatient, re-infected	No	negative	negative PCR or low Ct	8.08	No	-	-	218	2020-11-23	2020-12-05	High	2020-11-23	positive	N/D	-	-	2021-06-29	Medium	2021-06-29	positive	2020-11-27	9.54	57.63		Yes
2266	f	37	2021-06-29	0	4.73	1.008	0.779	0.772817	Outpatient, re-infected	No	negative	negative PCR or low Ct	0.55	No	-	-	231	2020-11-10	2020-11-25	Low	2020-11-10	positive	N/D	-	-	2021-06-29	Low	2021-06-29	positive	2020-12-05	0.86	44.04
2299	f	32	2021-06-29	1	11.7	1.856	1.368	0.737069	Outpatient, re-infected	No	33.82	L452R,T478K	13.75	No	-	-	217	2020-11-24	2020-12-07	Low	2020-11-24	positive	N/D	-	-	2021-06-28	Low	?	?	2020-12-26	01,01,2021	265.7
2315	m	71	2021-06-29	0	11.7	1.394	1.157	0.829986	Outpatient, re-infected	No	36.41	negative PCR or low Ct	13.96	No	-	-	188	2020-12-23	2021-01-13	Low	2020-12-23	positive	N/D	-	-	2021-06-29	Low	2021-06-28	positive	2021-01-26	5.85	292.16		Yes
2324	f	62	2021-06-29	0	4.59	1.88	1.367	0.727128	Outpatient, re-infected	No	negative	negative PCR or low Ct	2.69	No	-	-	214	2020-11-27	2020-11-28	Middle	2020-11-27	positive	N/D	-	-	2021-06-29	Low	2021-06-29	positive	2020-11-24	7.92	22,05,2021
2328	m	52	2021-06-29	0	6.66	1.813	0.911	0.502482	Outpatient, re-infected	No	negative	negative PCR or low Ct	13.9	No	-	-	68	2021-04-22	2021-05-08	Low	2021-04-22	positive	N/D	-	-	2021-06-29	Low	2021-06-29	positive	2021-06-07	02,01,2021	639.72
2382	f	64	2021-06-30	3	11.7	2.092	2.145	1.02533	Outpatient, re-infected	No	36.87	negative PCR or low Ct	15.15	No	-	-	403	2020-05-23	2020-06-12	Low	2020-05-23	positive	N/D	-	-	2021-06-27	Low	?	?	2020-05-24	1.66	41.78
2383	f	31	2021-06-30	6	7.76	1.866	1.067	0.571811	Outpatient, re-infected	No	36.13	negative PCR or low Ct	7.33	No	-	-	72	2021-04-19	2021-05-15	Low	2021-04-19	positive	N/D	-	-	2021-06-24	Low	?	?	2021-03-03	0.12	0.14
2384	f	22	2021-06-30	2	3.34	1.187	0.632	0.532435	Outpatient, re-infected	No	41.3	negative PCR or low Ct	0.62	No	-	-	175	2021-01-06	2021-01-27	Low	2021-01-06	positive	N/D	-	-	2021-06-28	No sympthoms	2021-06-27	positive	2021-06-27	0.58	4.21
2388	f	40	2021-06-30	0	2.34	0.597	0.487	0.815745	Outpatient, re-infected	No	31.04	V395L,L452R,T478K,V483F	0.67	No	-	-	263	2020-10-10	2020-10-30	Low	2020-10-10	positive	N/D	-	-	2021-06-30	Low	2021-06-30	positive
2418	m	20	2021-06-30	0	10.33	1.286	1.273	0.989891	Outpatient, re-infected	No	negative	negative PCR or low Ct	4.95	No	-	-	192	2020-12-20	2021-01-10	No sympthoms	2020-12-20	positive	N/D	-	-	2021-06-30	No sympthoms	2021-06-29	positive	2021-01-25	0.64	134.13
2439	m	21	2021-06-30	2	11.7	0.737	0.838	1.13704	Outpatient, re-infected	No	negative	negative PCR or low Ct	13.27	No	-	-	415	2020-05-11	2020-05-29	Low	2020-05-11	positive	N/D	-	-	2021-06-28	Low	2021-06-27	positive
2460	f	49	2021-06-30	2	4.96	1.584	1.412	0.891414	Outpatient, re-infected	No	21.09	L452R,T478K	2.04	No	-	-	259	2020-10-14	2020-11-03	Low	2020-10-14	positive	N/D	-	-	2021-06-28	Low	2021-06-27	positive
2506	m	44	2021-07-05	0	7.65	2.927	2.472	0.844551	Outpatient, re-infected	No	27.53	L452R,T478K	6.28	No	-	-	199	2020-12-18		Low	2020-12-18	positive	N/D	-	-	2021-07-05	No sympthoms	2021-07-05	positive
2549	m	40	2021-07-05	0	2.1	0.806	0.335	0.415633	Outpatient, re-infected	No	24.84	L452R,T478K	1.4	No	-	-	202	2020-12-15		Middle	2020-12-15	positive	N/D	-	-	2021-07-05	Medium	2021-07-05	positive
2583	m	59	2021-07-05	0	17.14	2.919	2.981	1.02124	Outpatient, re-infected	No	38.868	negative PCR or low Ct	10.85	No	-	-	207	2020-12-10		Low	2020-12-10	positive	N/D	-	-	2021-07-05	No sympthoms	2021-07-05	positive
2607	f	20	2021-07-05	0	11.76	0.72	0.873	1.2125	Outpatient, re-infected	No	28.94	L452R,T478K	7.17	No	-	-	212	2020-12-05		Low	2020-12-05	positive	N/D	-	-	2021-07-05	Low	2021-07-05	positive
2248	f	84	2021-06-29	3	11.7	0.666	0.617	0.926426	Hospital patient, primarily infected	No	negative	negative PCR or low Ct	7.74	one dose (partial course)	Sputnik V, component 1 (Ad26)	2021-06-23										2021-06-26	High	?	?					Yes
2249	f	59	2021-06-29	8	11.7	0.582	0.098	0.168385	Hospital patient, primarily infected	No	negative	negative PCR or low Ct	12.31	No	-	-										2021-06-21	High	?	?
2250	m	79	2021-06-29	10	11.7	3.759	0.511	0.13594	Hospital patient, primarily infected	No	negative	negative PCR or low Ct	7.94	No	-	-										2021-06-19	High	?	?					Yes
2252	m	74	2021-06-29	8	11.7	1.351	0.333	0.246484	Hospital patient, primarily infected	No	33.13	L452R,T478K	12.94	No	-	-										2021-06-21	High	?	?
2408	f	77	2021-06-30	7	2.47	0.345	0.058	0.168116	Hospital patient, primarily infected	No	32.7	L452R,T478K	11.7	one dose (partial course)	Sputnik V, component 1 (Ad26)	2021-06-14										2021-06-23	High	?	?					Yes
Т29	f	85	2021-07-08	11	11.7	1.122	0.28	0.249554	Hospital patient, primarily infected	No	N/D	N/D	12.38	No	-	-										2021-06-27	High	2021-06-27	positive	2021-06-28	0.21	0.37
Т30	f	81	2021-07-08	14	11.7	1.626	0.31	0.190652	Hospital patient, primarily infected	No	N/D	N/D	13.05	No	-	-										2021-06-24	High	2021-06-24	positive	2021-06-26	0.4	24.21		Yes
Т31	m	62	2021-07-08	15	11.7	2.861	1.1	0.384481	Hospital patient, primarily infected	No	N/D	N/D	14.44	No	-	-										2021-06-23	High	2021-06-23	positive	2021-06-21	0.11	0.19
Т32	f	74	2021-07-08	17	11.7	3.235	0.778	0.240495	Hospital patient, primarily infected	No	N/D	N/D	13.33	No	-	-										2021-06-21	High	2021-06-21	positive	2021-06-30	0.78	21.22
Т34	m	53	2021-07-08	3	5.55	0.611	0.174	0.284779	Hospital patient, primarily infected	No	N/D	N/D	4.69	No	-	-										2021-07-05	High	2021-07-05	positive
Т35	f	73	2021-07-08	15	11.7	2.262	0.762	0.33687	Hospital patient, primarily infected	No	N/D	N/D	12.67	No	-	-										2021-06-23	High	2021-06-23	positive	2021-06-23	0.35	2.1
Т36	f	81	2021-07-08	11	11.7	2.46	0.786	0.319512	Hospital patient, primarily infected	No	N/D	N/D	14.25	No	-	-										2021-06-27	High	2021-06-27	positive	2021-06-26	0.2	2.45
Т37	m	41	2021-07-08	3	10.45	2.853	0.613	0.214862	Hospital patient, primarily infected	No	N/D	N/D	5.84	No	-	-										2021-07-05	High	2021-07-05	positive	2021-07-03	1.57	3.09
Т38	m	68	2021-07-08	15	11.7	0.395	0.162	0.410127	Hospital patient, primarily infected	No	N/D	N/D	14.13	No	-	-										2021-06-23	High	2021-06-23	positive	2021-06-23	0.92	4.87
Т39	f	66	2021-07-08	3	11.7	1.664	0.369	0.221755	Hospital patient, primarily infected	No	N/D	N/D	14.03	No	-	-										2021-07-05	High	?	?	2021-06-28	0.72	4.41
Т40	f	83	2021-07-08	10	11.22	2.362	0.553	0.234124	Hospital patient, primarily infected	Yes	N/D	N/D	13.69	No	-	-										2021-06-28	High	2021-06-28	positive	2021-06-30	0.83	1.7
Т41	f	69	2021-07-08	13	11.7	2.762	0.387	0.140116	Hospital patient, primarily infected	No	N/D	N/D	13.05	No	-	-										2021-06-25	High	2021-06-25	positive	2021-06-30	1.39	3.65
Т42	f	89	2021-07-08	13	6.79	0.82	0.102	0.12439	Hospital patient, primarily infected	No	N/D	N/D	14.43	No	-	-										2021-06-25	High	2021-06-25	positive	2021-06-27	0.96	4.29
Т43	f	61	2021-07-08	8	1.97	0.47	0.195	0.414894	Hospital patient, primarily infected	No	N/D	N/D	13.27	No	-	-										2021-06-30	High	2021-06-30	positive	2021-07-07	8.77	96.37
Т44	m	69	2021-07-08	12	11.7	2.348	0.554	0.235945	Hospital patient, primarily infected	No	N/D	N/D	10.25	No	-	-										2021-06-26	High	2021-06-26	positive	2021-06-27	0.18	0.18		Yes
Т46	m	59	2021-07-08	14	9.88	2.189	0.476	0.217451	Hospital patient, primarily infected	No	N/D	N/D	13.81	No	-	-										2021-06-24	High	2021-06-24	positive	2021-06-26	0.19	0.34
Т48	m	51	2021-07-08	15	11.7	1.019	0.254	0.249264	Hospital patient, primarily infected	No	N/D	N/D	8.94	No	-	-										2021-06-23	High	2021-06-23	positive	2021-06-28	0.13	1.48
Т49	f	65	2021-07-08	12	11.7	0.316	0.079	0.25	Hospital patient, primarily infected	No	N/D	N/D	13.66	No	-	-										2021-06-26	High	2021-06-26	positive	2021-07-03	0.5	9.52
Т50	f	89	2021-07-08	7	11.7	1.659	0.223	0.134418	Hospital patient, primarily infected	No	N/D	N/D	9.52	No	-	-										2021-07-01	High	2021-07-01	positive	2021-07-04	3.19	22.65		Yes
Т54	f	59	2021-07-09	10	11.7	1.791	0.41	0.228922	Hospital patient, primarily infected	No	N/D	N/D	12.87	No	-	-										2021-06-29	High	2021-06-29	positive	2021-07-07	4.2	169.04
Т55	f	71	2021-07-09	6	11.7	1.788	0.67	0.37472	Hospital patient, primarily infected	No	N/D	N/D	13.12	No	-	-										2021-07-03	High	?	?	2021-07-06	1.28	16.17
Т56	m	65	2021-07-09	9	3.53	0.946	0.304	0.321353	Hospital patient, primarily infected	No	N/D	N/D	2.8	No	-	-										2021-06-30	High	2021-06-30	positive	2021-07-06	0.79	0.34
Т60	f	68	2021-07-09	6	1.3	0.236	0.062	0.262712	Hospital patient, primarily infected	No	N/D	N/D	5.95	No	-	-										2021-07-03	High	2021-07-03	positive
Т61	f	63	2021-07-09	11	6.66	1.411	0.444	0.31467	Hospital patient, primarily infected	No	N/D	N/D	14.68	No	-	-										2021-06-28	High	2021-06-28	positive	2021-07-01	0.21	1.96
Т63	m	51	2021-07-09	5	11.7	0.852	0.228	0.267606	Hospital patient, primarily infected	No	N/D	N/D	10.44	No	-	-										2021-07-04	High	2021-07-04	positive
Т64	m	60	2021-07-09	1	11.7	1.714	0.316	0.184364	Hospital patient, primarily infected	No	N/D	N/D	12.53	No	-	-										2021-07-08	High	2021-07-08	positive	2021-07-07	3.51	63.24
Т65	f	60	2021-07-09	1	1.66	0.38	0.109	0.286842	Hospital patient, primarily infected	No	N/D	N/D	1.63	No	-	-										2021-07-08	High	2021-07-08	positive	2021-07-07	1.4	0.39
Т66	m	25	2021-07-09	1	3.9	0.892	0.716	0.802691	Hospital patient, primarily infected	No	N/D	N/D	0.31	No	-	-										2021-07-08	High	?	?	2021-07-08	0.25	3.86
Т67	m	34	2021-07-09	4	4.78	1.247	0.596	0.477947	Hospital patient, primarily infected	No	N/D	N/D	8.2	No	-	-										2021-07-05	High	2021-07-05	positive	2021-07-07	3.13	60.37
Т69	m	71	2021-07-09	4	2.85	0.645	0.194	0.300775	Hospital patient, primarily infected	No	N/D	N/D	0.06	No	-	-										2021-07-05	High	2021-07-05	positive	2021-07-04	0.21	0.27
Т71	f	36	2021-07-09	11	2.06	0.741	0.2	0.269906	Hospital patient, primarily infected	No	N/D	N/D	2.09	No	-	-										2021-06-28	High	2021-06-28	positive	2021-07-07	2.77	0.69
Т73	f	88	2021-07-09	4	10.03	0.532	0.111	0.208647	Hospital patient, primarily infected	No	N/D	N/D	6.2	No	-	-										2021-07-05	High	2021-07-05	positive	2021-07-05	1.49	3.66
Т74	f	73	2021-07-09	5	11.7	1.841	0.245	0.13308	Hospital patient, primarily infected	Yes	N/D	N/D	8.82	No	-	-										2021-07-04	High	2021-07-04	positive	2021-07-04	0.34	0.97
Т76	m	65	2021-07-09	3	4.97	1.205	0.219	0.181743	Hospital patient, primarily infected	No	N/D	N/D	13.78	No	-	-										2021-07-06	High	2021-07-06	positive	2020-06-03	1.94	3.5
Т77	f	49	2021-07-09	9	11.7	1.239	0.158	0.127522	Hospital patient, primarily infected	No	N/D	N/D	14.38	No	-	-										2021-06-30	High	2021-06-30	positive	2021-07-02	0.86	1.99	Yes
Т82	m	61	2021-07-09	15	11.7	1.333	0.216	0.162041	Hospital patient, primarily infected	No	N/D	N/D	14.68	No	-	-										2021-06-24	High	2021-06-24	positive	2021-06-24	0.11	0.98		Yes
Т83	m	56	2021-07-09	3	4.24	1.342	0.285	0.21237	Hospital patient, primarily infected	No	N/D	N/D	14.46	No	-	-										2021-07-06	High	2021-07-06	positive
Т84	m	59	2021-07-09	15	11.7	0.755	0.319	0.422517	Hospital patient, primarily infected	No	N/D	N/D	15.06	No	-	-										2021-06-24	High	2021-06-24	positive	2021-06-26	18.12	171.87
Т85	m	65	2021-07-09	3	11.7	2.562	0.682	0.266198	Hospital patient, primarily infected	No	N/D	N/D	15.03	No	-	-										2021-07-06	High	?	?	2021-07-04	14.5	134.11
Т87	f	76	2021-07-09	10	9.2	0.469	0.076	0.162047	Hospital patient, primarily infected	No	N/D	N/D	9.43	No	-	-										2021-06-29	High	2021-06-29	positive	2021-06-30	0.09	0.23
Т88	f	75	2021-07-09	13	11.7	0.664	0.121	0.182229	Hospital patient, primarily infected	No	N/D	N/D	7.28	No	-	-										2021-06-26	High	2021-06-26	positive	2021-06-24	0.08	0.06
Т89	f	68	2021-07-09	11	11.7	3.939	3.191	0.810104	Hospital patient, primarily infected	No	N/D	N/D	15.31	No	-	-										2021-06-28	High	2021-06-28	positive	2021-07-04	1	166.1
Т90	m	34	2021-07-09	11	11.7	2.667	1.034	0.387702	Hospital patient, primarily infected	No	N/D	N/D	13.54	No	-	-										2021-06-28	High	2021-06-28	positive	2021-06-30	10.91	66.38
Т91	f	69	2021-07-09	7	11.7	1.836	0.494	0.269063	Hospital patient, primarily infected	No	N/D	N/D	14	No	-	-										2021-07-02	High	2021-07-02	positive	2021-07-07	8.04	263.55
Т92	m	85	2021-07-09	0	11.7	0.782	0.255	0.326087	Hospital patient, primarily infected	No	N/D	N/D	14.99	No	-	-										2021-07-09	High	2021-07-12	positive	2021-07-08	12.64	189.08
Т93	f	50	2021-07-09	12	11.7	0.603	0.295	0.489221	Hospital patient, primarily infected	No	N/D	N/D	15.26	No	-	-										2021-06-27	High	2021-06-27	positive	2021-07-04	2.96	87.69
Т95	m	65	2021-07-09	14	8.53	0.8	0.046	0.0575	Hospital patient, primarily infected	No	N/D	N/D	14.03	No	-	-										2021-06-25	High	2021-06-25	positive	2021-06-26	0.62	61.17
Т96	m	69	2021-07-09	11	11.7	0.79	0.531	0.672152	Hospital patient, primarily infected	No	N/D	N/D	13.12	No	-	-										2021-06-28	High	?	?	2021-06-28	16.63	237.17
Т97	f	70	2021-07-09	5	11.7	0.658	0.178	0.270517	Hospital patient, primarily infected	No	N/D	N/D	14.25	No	-	-										2021-07-04	High	2021-07-04	positive
Т98	f	66	2021-07-09	10	11.7	1.738	0.453	0.260644	Hospital patient, primarily infected	No	N/D	N/D	13.73	No	-	-										2021-06-29	High	2021-06-29	positive	2021-06-30	0.21	0.44
Т99	f	81	2021-07-09	7	11.7	0.585	0.155	0.264957	Hospital patient, primarily infected	No	N/D	N/D	14.68	No	-	-										2021-07-02	High	2021-07-02	positive	2021-07-06	3.03	137.36
Т100	f	69	2021-07-09	12	11.7	0.697	0.169	0.242468	Hospital patient, primarily infected	No	N/D	N/D	14.46	No	-	-										2021-06-27	High	2021-06-27	positive	2021-06-27	1.36	6.06		Yes
Т101	m	49	2021-07-09	8	11.7	0.657	0.187	0.284627	Hospital patient, primarily infected	No	N/D	N/D	10.22	No	-	-										2021-07-01	High	2021-07-01	positive	2021-06-30	0.41	1.91
Т102	f	33	2021-07-09	5	11.7	0.493	0.119	0.241379	Hospital patient, primarily infected	No	N/D	N/D	13.64	No	-	-										2021-07-04	High	?	?
Т103	m	53	2021-07-09	9	11.7	2.376	0.501	0.210859	Hospital patient, primarily infected	No	N/D	N/D	11.98	No	-	-										2021-06-30	High	2021-06-30	positive	2021-06-30	0.2	0.18
Т104	m	71	2021-07-09	5	2.38	0.373	0.237	0.635389	Hospital patient, primarily infected	No	N/D	N/D	6.2	No	-	-										2021-07-04	High	2021-07-04	positive	2021-07-08	1.43	5.46
Т106	f	87	2021-07-09	3	10.77	2.619	0.238	0.0908744	Hospital patient, primarily infected	No	N/D	N/D	8.04	No	-	-										2021-07-06	High	2021-07-06	positive	2021-07-03	0.95	0.97
Т107	f	49	2021-07-09	16	11.7	2.285	0.656	0.28709	Hospital patient, primarily infected	No	N/D	N/D	13.89	No	-	-										2021-06-23	High	2021-06-23	positive	2021-07-01	3.86	28.72
Т108	m	78	2021-07-09	11	11.7	2.44	0.352	0.144262	Hospital patient, primarily infected	Yes	N/D	N/D	5.35	No	-	-										2021-06-28	High	2021-06-28	positive	2021-06-29	0.1	0.43		Yes
Т109	m	87	2021-07-09	6	10.64	0.808	0.805	0.996287	Hospital patient, primarily infected	No	N/D	N/D	11.45	No	-	-										2021-07-03	High	?	?	2021-07-03	0.98	165.24
Т110	f	59	2021-07-09	14	11.7	1.754	0.485	0.276511	Hospital patient, primarily infected	No	N/D	N/D	13.33	No	-	-										2021-06-25	High	2021-06-25	positive	2021-06-28	0.28	0.27
Т112	f	47	2021-07-09	13	11.7	2.844	0.841	0.29571	Hospital patient, primarily infected	No	N/D	N/D	13.97	No	-	-										2021-06-26	High	2021-06-26	positive	2021-06-26	7.06	10.27
Т113	f	92	2021-07-09	14	11.7	4.02	0.726	0.180597	Hospital patient, primarily infected	No	N/D	N/D	13.64	No	-	-										2021-06-25	High	2021-06-25	positive	2021-06-29	11.85	131.26
Т115	f	92	2021-07-09	14	11.7	3.321	0.666	0.200542	Hospital patient, primarily infected	No	N/D	N/D	7.81	No	-	-										2021-06-25	High	2021-06-25	positive	2021-06-26	0.16	0.7
Т116	f	90	2021-07-09	8	11.7	1.036	0.152	0.146718	Hospital patient, primarily infected	No	N/D	N/D	12.99	No	-	-										2021-07-01	High	2021-07-01	positive	2021-06-30	0.31	21.59		Yes
Т117	f	84	2021-07-09	0	11.7	3.614	0.656	0.181516	Hospital patient, primarily infected	No	N/D	N/D	13.59	No	-	-										2021-07-09	High	2021-07-09	positive	2021-07-03	9.06	44.22
Т119	m	36	2021-07-09	13	8.23	2.068	0.215	0.103965	Hospital patient, primarily infected	No	N/D	N/D	4.57	No	-	-										2021-06-26	High	2021-06-26	positive	2021-07-01	0.23	0.27
Т121	f	82	2021-07-09	7	11.7	1.18	0.197	0.166949	Hospital patient, primarily infected	No	N/D	N/D	12.28	No	-	-										2021-07-02	High	2021-07-02	positive	2021-07-06	14.57	48.45		Yes
Т125	m	44	2021-07-09	2	0.05	2.342	0.585	0.249787	Hospital patient, primarily infected	No	N/D	N/D	0.1	No	-	-										2021-07-07	High	2021-07-07	positive
Т126	f	64	2021-07-09	15	11.7	3.985	1.152	0.289084	Hospital patient, primarily infected	No	N/D	N/D	7.63	No	-	-										2021-06-24	High	2021-06-24	positive	2021-06-28	1.48	0.37
Т128	f	91	2021-07-09	7	1.1	0.301	0.173	0.574751	Hospital patient, primarily infected	No	N/D	N/D	2.49	No	-	-										2021-07-02	High	2021-07-02	positive	2021-07-01	1.46	0.46
Т129	f	79	2021-07-09	7	1.46	0.81	0.229	0.282716	Hospital patient, primarily infected	No	N/D	N/D	10.96	No	-	-										2021-07-02	High	?	?	2021-07-02	12.04	47.83		Yes
Т134	f	92	2021-07-09	15	2.23	1.732	0.464	0.267898	Hospital patient, primarily infected	No	N/D	N/D	N/D	No	-	-										2021-06-24	High	2021-06-24	positive	2021-06-21	0.53	214.59
Т227	m	85	2021-07-09	15	5.14	1.888	0.556	0.294492	Hospital patient, primarily infected	No	N/D	N/D	7.23	No	-	-										2021-06-24	High	2021-06-24	positive	2021-06-24	0.17	0.11		Yes
Т230	m	83	2021-07-09	12	11.7	2.539	0.542	0.21347	Hospital patient, primarily infected	Yes	N/D	N/D	14.78	No	-	-										2021-06-27	High	2021-06-27	positive	2021-06-29	0.34	1.74		Yes
Т234	f	72	2021-07-09	15	11.7	1.277	0.2	0.156617	Hospital patient, primarily infected	Yes	N/D	N/D	11.44	No	-	-										2021-06-24	High	2021-06-24	positive	2021-06-27	0.16	0.18		Yes
Т240	f	64	2021-07-09	11	11.7	1.571	0.715	0.455124	Hospital patient, primarily infected	Yes	N/D	N/D	13.96	No	-	-										2021-06-28	High	2021-06-28	positive	2021-06-28	0.1	0.24
3267	f	62	2021-07-14	14	11.7	1.074	0.136	0.126629	Hospital patient, re-infected	No	38.52	negative PCR or low Ct	11.99	No	-	-	201	2020-12-25	N/A	N/A	2020-12-25	positive	N/A	0.13	0	2021-06-30	High	2021-06-30	positive		0.13	0
Т2	f	63	2021-07-08	8	11.7	1.392	1.374	0.987069	Hospital patient, re-infected	No	N/D	N/D	14.33	No	-	-	433	2020-05-01	2020-05-25	Middle	2020-05-01	positive	2020-06-10	7.09	139.99	2021-06-30	High	2021-06-30	positive	2020-06-10	7.09	139.99		Yes
Т4	f	50	2021-07-08	13	11.7	0.387	0.11	0.284238	Hospital patient, re-infected	No	N/D	N/D	16.15	No	-	-	386	2020-06-17	2021-07-09	Middle	2020-06-17	positive	2020-06-15	0.86	1.5	2021-06-25	High	2021-06-25	positive	2020-06-15	0.86	1.5	Yes
Т5	m	69	2021-07-08	15	11.7	2.776	1.208	0.435159	Hospital patient, re-infected	No	N/D	N/D	15.83	No	-	-	229	2020-11-21	N/A	High	2020-11-21	positive	2021-06-11	0.31	0.6	2021-06-23	High	2021-06-23	positive	2021-06-11	0.31	0.6
Т6	m	59	2021-07-08	12	9.88	2.199	0.367	0.166894	Hospital patient, re-infected	No	N/D	N/D	13.04	No	-	-	203	2020-12-17	N/A	High	2020-12-17	positive	2020-12-18	0.69	5.19	2021-06-26	High	2021-06-26	positive	2020-12-28	0.69	5.19
Т184	f	66	2021-07-09	16	11.7	1.669	0.472	0.282804	Hospital patient, re-infected	No	N/D	N/D	12.26	No	-	-	325	2020-08-18	N/A	High	2020-08-18	positive	2021-05-11	1.9	0.26	2021-06-23	High	2021-06-23	positive	2021-05-25	1.9	0.26
Т204	m	58	2021-07-09	8	2.35	0.514	0.163	0.317121	Hospital patient, re-infected	No	N/D	N/D	13.48	No	-	-	206	2020-12-15	N/A	Middle	2020-12-15	positive	2021-07-04	0.3	1.66	2021-07-01	High	2021-07-01	positive	2021-07-04	0.3	1.66
Т205	f	50	2021-07-09	6	11.7	0.974	0.162	0.166324	Hospital patient, re-infected	No	N/D	N/D	13.48	No	-	-	163	2021-01-27	2021-07-09	Middle	2021-01-27	positive	2021-07-02	4.43	94.34	2021-07-03	High	2021-07-03	positive	2021-07-02	4.43	94.34
Т215	m	61	2021-07-09	12	11.7	2.179	0.402	0.184488	Hospital patient, re-infected	No	N/D	N/D	13.38	No	-	-	373	2020-07-01	N/A	Middle	2020-07-01	positive	2020-07-13	0.34	0.48	2021-06-27	High	2021-06-27	positive	2020-07-13	0.34	0.48		Yes
Т220	m	40	2021-07-09	16	11.7	0.921	0.322	0.34962	Hospital patient, re-infected	No	N/D	N/D	8.95	No	-	-	191	2020-12-30	N/A	High	2020-12-30	positive	2021-01-21	1.11	0.19	2021-06-23	High	2021-06-23	positive	2021-01-21	1.11	0.19
